# Supplementary figures and images for: Clinical efficacy of rotary versus manual instrumentation in pulpectomy for mandibular primary molars: a focus on operative efficiency and postoperative pain in children
Source: Research Square preprint supplement (doi:10.21203/rs.3.rs-7929720/v1), 2025-11-11

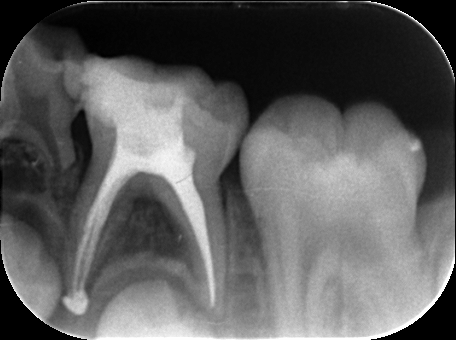

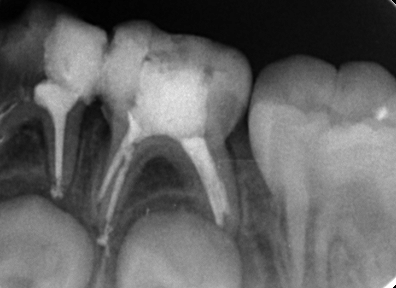

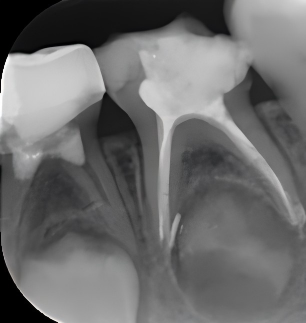


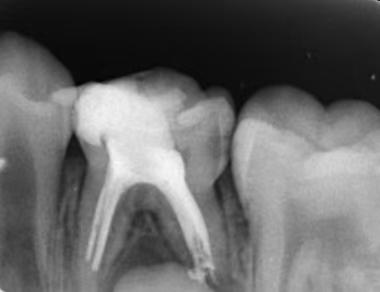

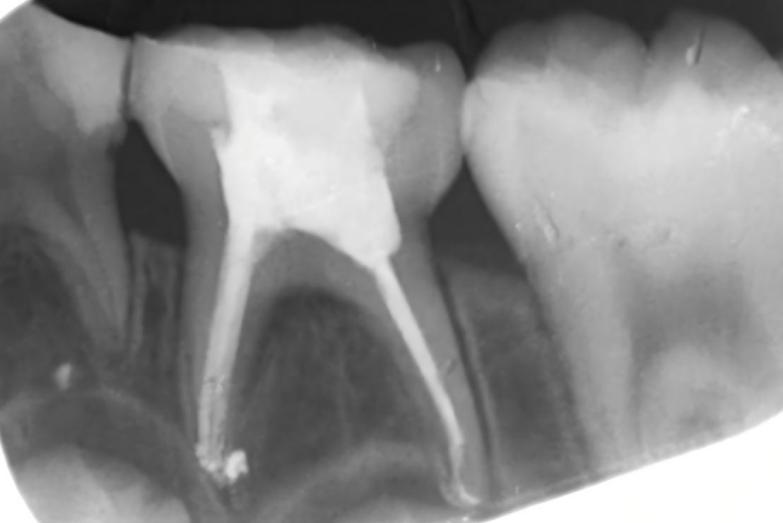

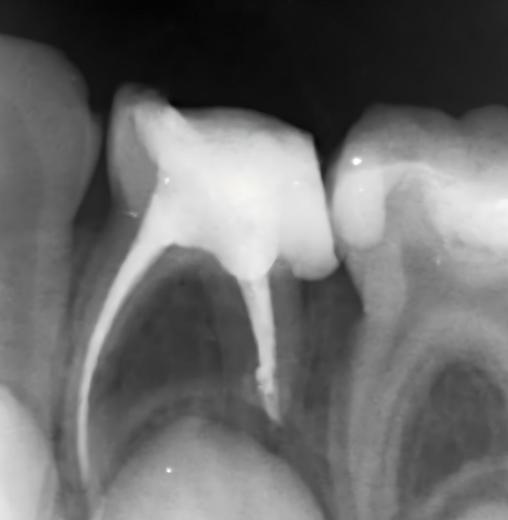

Supplement: Supplementary file 1 [file 88865c4defabfae8aa768c53.docx]
